# Supplementary material for: Lithium ion diffusion mechanism on the inorganic components of the solid–electrolyte interphase
Source: Royal Society of Chemistry journal article supplement (doi:10.1039/d0ta11444h), 2021-01-01
Supplement: d0ta11444h1.pdf [file d0ta11444h1.pdf]

## Supporting Information

### **Lithium Ions Diffusion Mechanism on Inorganic Components of Solid-Electrolyte Interphase**

Jianhui Zheng<sup>a</sup>, Zhijin Ju<sup>a</sup>, Baolin Zhang<sup>a</sup>, Jianwei Nai<sup>a</sup>, Tiefeng Liu<sup>a</sup>, Yujing Liu<sup>a</sup>, Qifan Xie<sup>a</sup>, Wenkui Zhang<sup>a</sup>, Yao Wang<sup>\*a</sup>  
and Xinyong Tao<sup>\*a</sup>

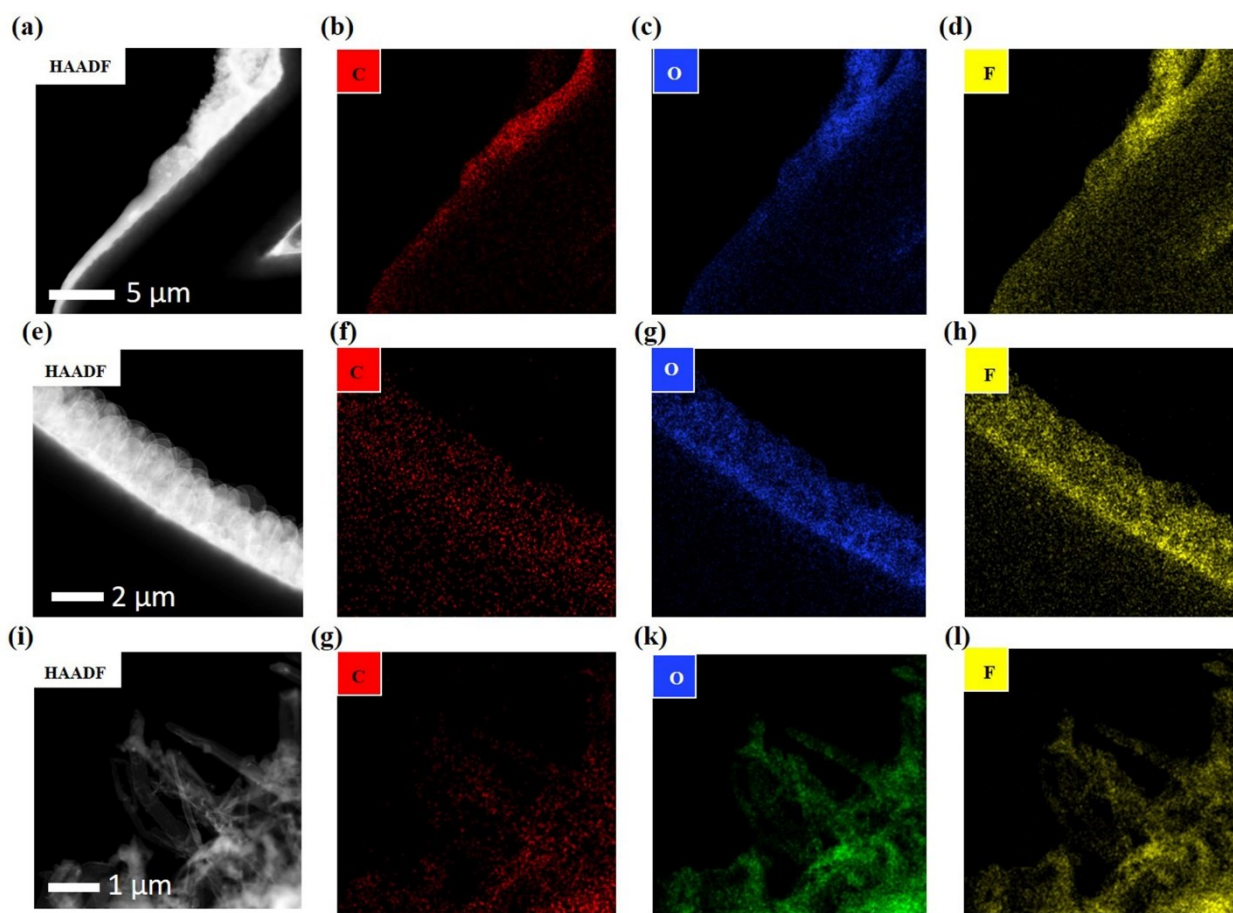

**Fig. S1.** STEM image of Li deposited and the corresponding elemental mapping images of the C, O, F in SEI formed in (a-d) PEO, (e-h) DOL/DME and (i-l) EC/DEC based electrolyte.

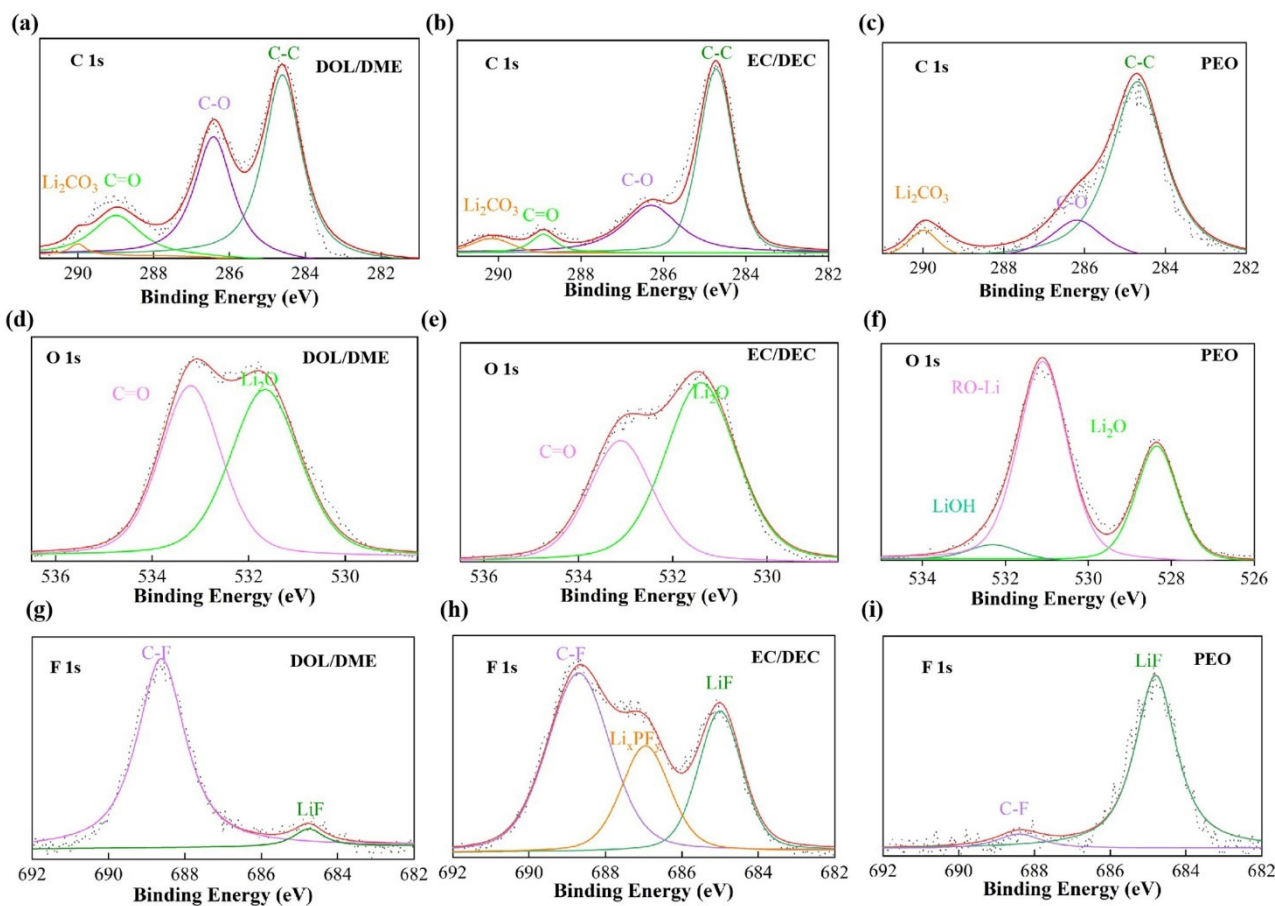

**Fig. S2.** The C, O and F 1 s XPS spectra of the SEI formed in (a, d, g) DOL/DME, (b, e, h) EC/DEC and (c, f, i) PEO based electrolyte.

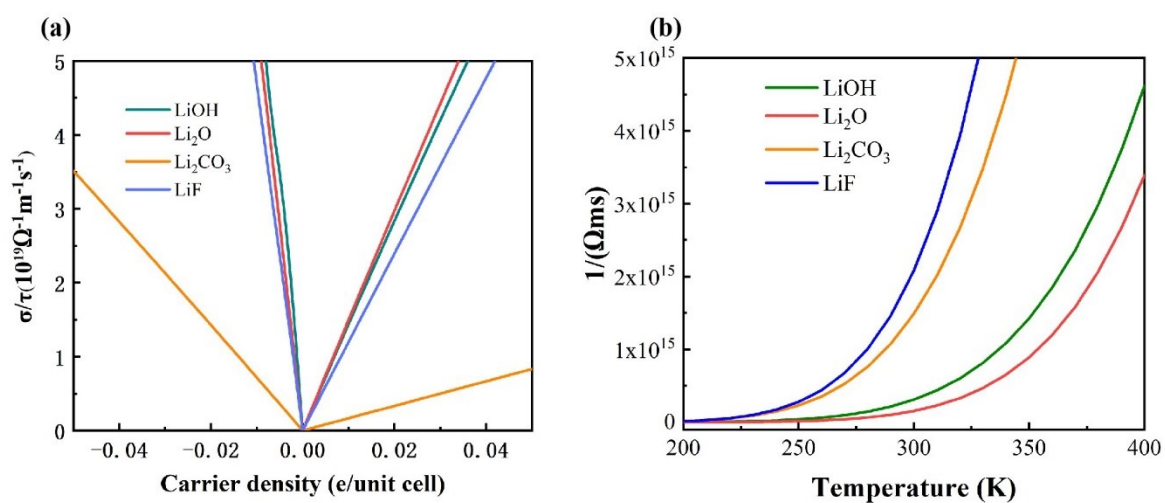

**Fig. S3.** The (a)  $\sigma/\tau$  at 300K and (b) electrical conductivity of LiOH, Li<sub>2</sub>O, Li<sub>2</sub>CO<sub>3</sub> and LiF.  $\sigma$  is electrical conductivity,  $\tau$  is relaxation time.

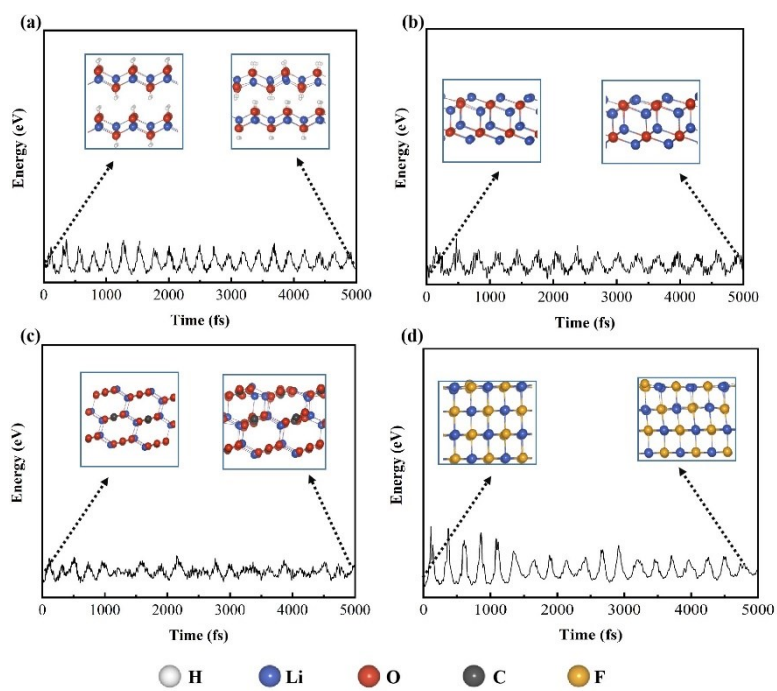

**Fig. S4.** AIMD simulations of (a)  $\text{LiOH}$ , (b)  $\text{Li}_2\text{O}$ , (c)  $\text{Li}_2\text{CO}_3$ , (d)  $\text{LiF}$  and corresponding initial/final structures(inserts).

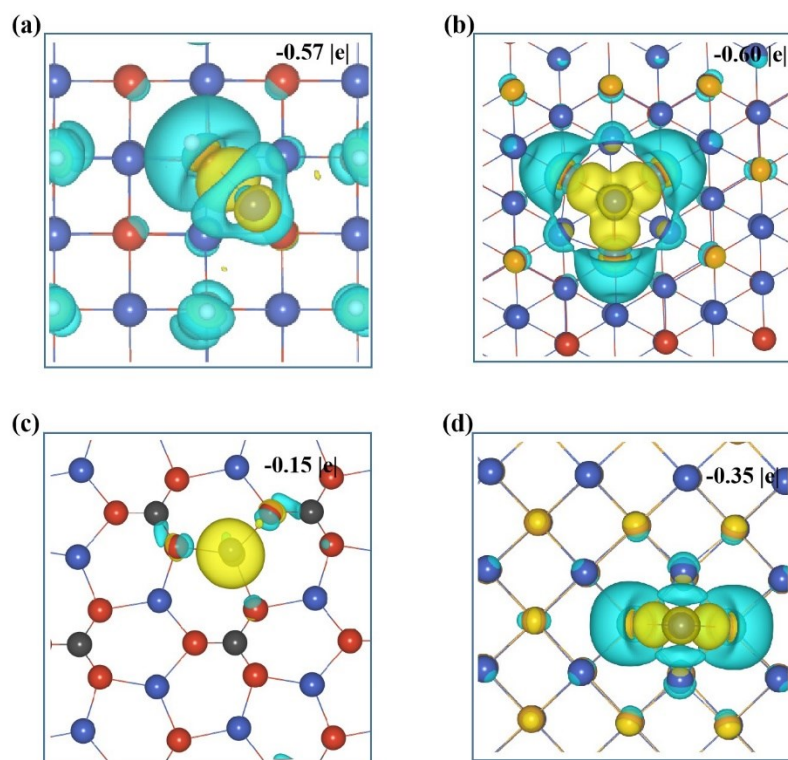

**Fig. S5.** Top view of charge density difference of a Li atom absorbed on (a) LiOH(001), (b) Li<sub>2</sub>O(111), (c) Li<sub>2</sub>CO<sub>3</sub>(001) and (d) LiF(001) surface at saddle-point configurations. The isosurface value is 0.001 e/Bohr<sup>3</sup>. Electron accumulation and depletion are represented by yellow and blue isosurfaces, respectively.

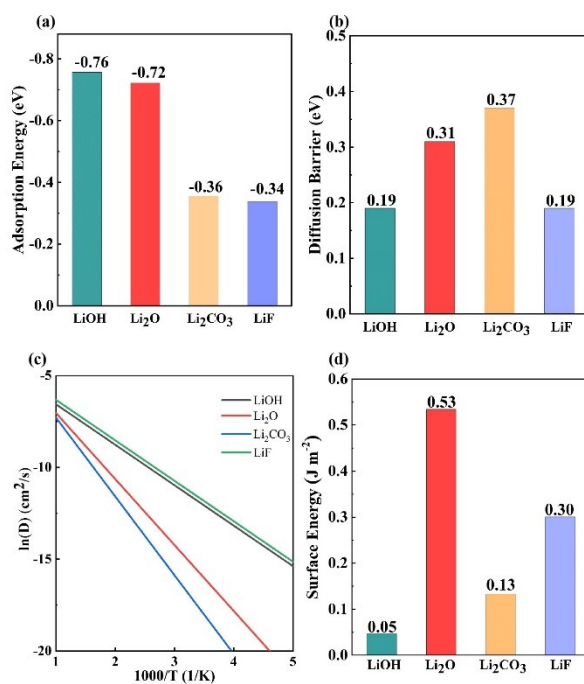

**Fig. S6.** (a) Adsorption Energy, (b) Diffusion Energy and (c) Arrhenius plot of diffusion coefficient of Li atom on LiOH(001), Li<sub>2</sub>O(111), Li<sub>2</sub>CO<sub>3</sub>(001) and LiF(001) surfaces. (d) Surface Energy of LiOH(001), Li<sub>2</sub>O(111), Li<sub>2</sub>CO<sub>3</sub>(001) and LiF (001).

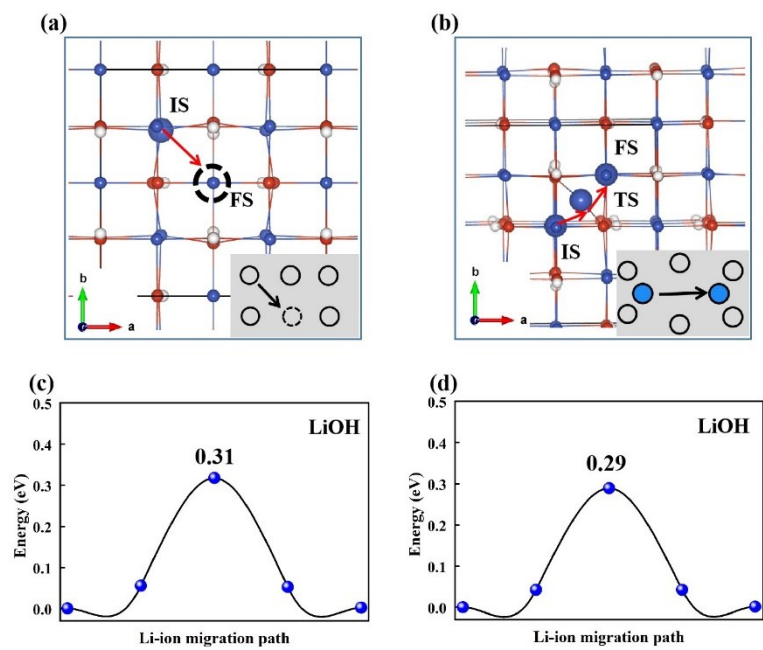

**Fig. S7.** Migration pathways and potential energy profiles for (a) (c) vacancy diffusion mechanism and (b) (d) direct-hopping diffusion mechanism in LiOH.



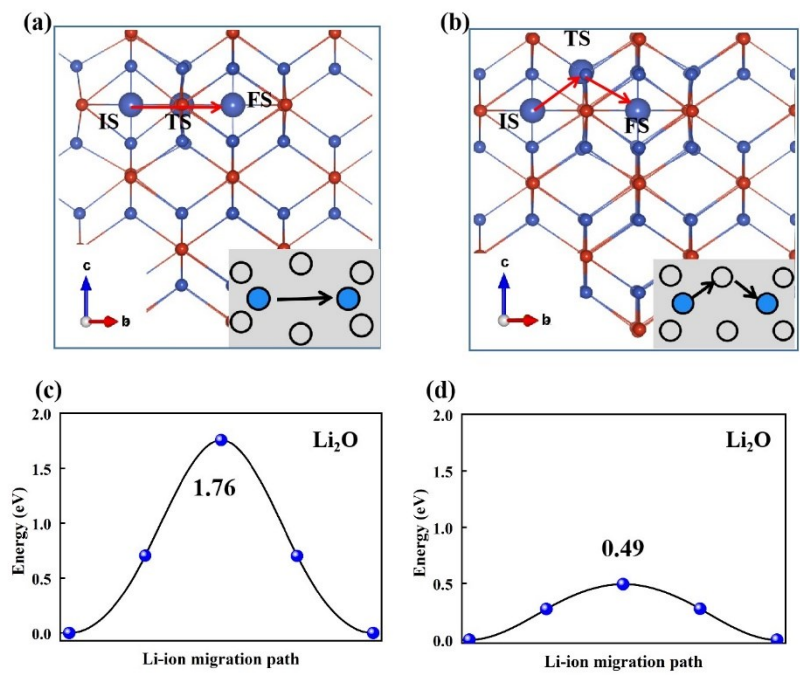

**Fig. S8.** Migration pathways and potential energy profiles for (a) (c) direct-hopping diffusion mechanism and (b) (d) knock off diffusion mechanism in  $\text{Li}_2\text{O}$ .

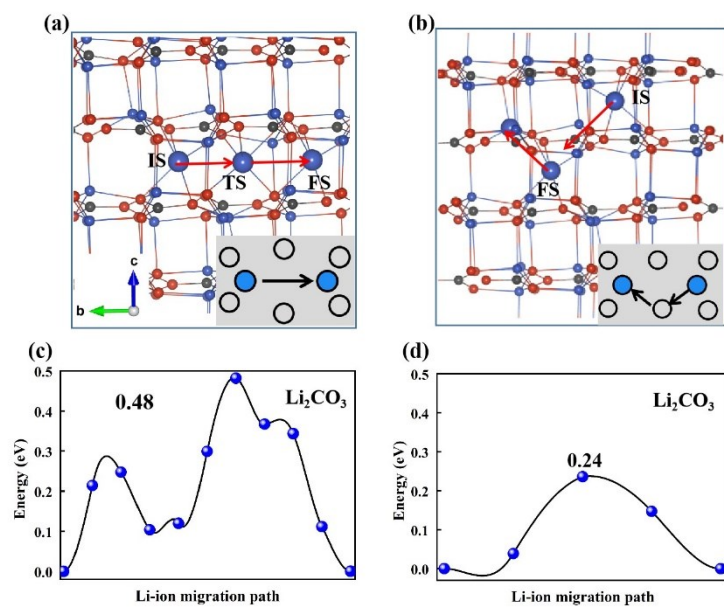

**Fig. S9.** Migration pathways and potential energy profiles for (a) (c) direct-hopping mechanism and (b) (d) knock-off mechanism in  $\text{Li}_2\text{CO}_3$ .

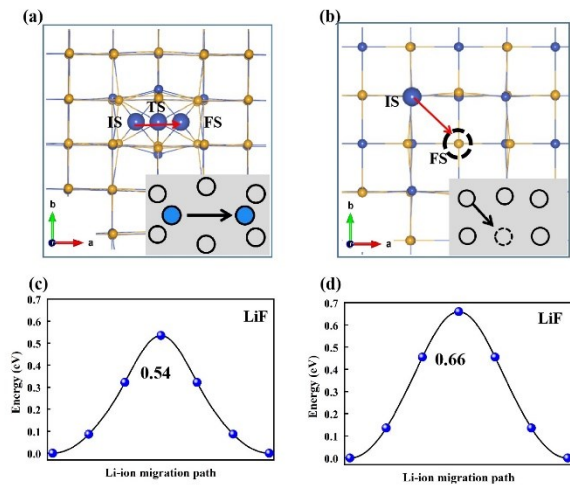

**Fig. S10.** Migration pathways and potential energy profiles for (a) (c) direct-hopping mechanism and (b) (d) vacancy mechanism in LiF.

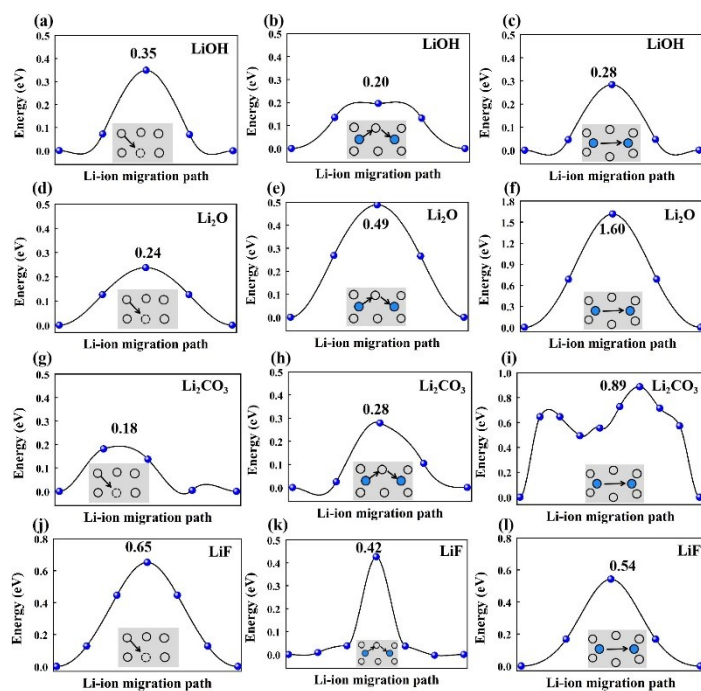

**Fig. S11.** The migration pathways schematic diagram (inserts) and potential energy profiles of vacancy, knock-off and direct-hopping diffusion mechanisms in (a-c) LiOH, (d-f) Li<sub>2</sub>O, (g-i) Li<sub>2</sub>CO<sub>3</sub> and (j-l) LiF, respectively. Vacancy and interstitial lithium defects are neutral.

**Table. S1.** Atomic fraction (%) of the C, O, F in the SEI formed in PEO, DOL/DME and EC/DEC electrolyte analyzed by EDS.

|         | C     | O     | F    |
|---------|-------|-------|------|
| PEO     | 7.12  | 91.45 | 1.43 |
| DOL/DME | 5.05  | 93.33 | 1.62 |
| EC/DEC  | 10.52 | 84.46 | 5.02 |

**Table.S2.** The mole ratio of  $\text{Li}_2\text{CO}_3$ ,  $\text{Li}_2\text{O}$ ,  $\text{LiF}$ ,  $\text{LiOH}$  in the SEI formed in different electrolytes calculated from XPS.

|         | $\text{Li}_2\text{CO}_3$ | $\text{Li}_2\text{O}$ | $\text{LiF}$ | $\text{LiOH}$ |
|---------|--------------------------|-----------------------|--------------|---------------|
| PEO     | 1.47                     | 20.92                 | 4.86         | 1.63          |
| DOL/DME | 0.24                     | 15.33                 | 0.49         |               |
| EC/DEC  | 1.44                     | 7.23                  | 5.47         |               |

**Table. S3.** Calculated Lattice Parameters and Band Gaps for LiOH, Li<sub>2</sub>O, Li<sub>2</sub>CO<sub>3</sub> and LiF.

| structures                      | lattice parameters (Å)                                                               | band gaps (eV) | space group              |
|---------------------------------|--------------------------------------------------------------------------------------|----------------|--------------------------|
| LiOH                            | a=b=3.567 c=4.399<br>$\alpha=\beta=\gamma=90^\circ$                                  | 5.481          | P4/nmm (No.129)          |
| Li <sub>2</sub> O               | a=b=c=4.630<br>$\alpha=\beta=\gamma=90^\circ$                                        | 6.262          | Fm $\bar{3}$ m (No. 225) |
| Li <sub>2</sub> CO <sub>3</sub> | a=8.374 b=5.016 c=6.320 $\alpha=90^\circ$<br>$\beta=114.094^\circ$ $\gamma=90^\circ$ | 6.803          | C2/c (No. 15)            |
| LiF                             | a=b=c=4.070<br>$\alpha=\beta=\gamma=90^\circ$                                        | 10.153         | Fm $\bar{3}$ m (No. 225) |

**Table. S4.** Calculated surface energies along different orientations. Other theoretical (in parentheses) values obtained from the literature are also presented for comparison.

|                                       | <b>N</b> | <b>Surface energies <math>\gamma</math> (J/m<sup>2</sup>)</b> | <b>Surface energies <math>\gamma</math> (meV/Å<sup>2</sup>)</b> |
|---------------------------------------|----------|---------------------------------------------------------------|-----------------------------------------------------------------|
| LiF(001)                              | 6        | 0.30(0.29) <sup>1</sup>                                       | 18.76                                                           |
|                                       | 7        | 0.30                                                          | 18.76                                                           |
| LiF(110)                              | 6        | 0.87                                                          | 54.10                                                           |
|                                       | 7        | 0.75                                                          | 46.61                                                           |
|                                       | 8        | 0.74                                                          | 46.42                                                           |
|                                       | 10       | 0.74                                                          | 46.42                                                           |
| Li <sub>2</sub> O(111)                | 4        | 0.53                                                          | 33.19                                                           |
|                                       | 5        | 0.53(0.54) <sup>2</sup>                                       | 33.19(30) <sup>3</sup>                                          |
| Li <sub>2</sub> O(110)                | 8        | 0.92                                                          | 58.03                                                           |
|                                       | 10       | 0.92                                                          | 58.03(56) <sup>3</sup>                                          |
| LiOH(001)                             | 6        | 0.05                                                          | 3.16                                                            |
|                                       | 8        | 0.05                                                          | 3.16                                                            |
| LiOH(101)                             | 6        | 0.30                                                          | 18.78                                                           |
|                                       | 8        | 0.30                                                          | 18.78                                                           |
| Li <sub>2</sub> CO <sub>3</sub> (001) | 12       | 0.13(0.163) <sup>4</sup>                                      | 8.33                                                            |
|                                       | 14       | 0.13                                                          | 8.33                                                            |



**Table. S5.** Diffusion Mechanisms, Associated Barriers ( $E_a$ ), Dimensionality of the diffusion ( $g$ ), Distance for the lithium ion migration ( $a$ ), Diffusion Coefficients ( $D$ ) in inorganic components.

| componet                        | mechanism      | $E_a$ (eV) | $g$ | $a$ ( $\times 10^{-8}$ cm ) | $D$ ( $\text{cm}^2/\text{s}$ ) |
|---------------------------------|----------------|------------|-----|-----------------------------|--------------------------------|
| LiOH                            | Surface        | 0.19       | 2   | 2.533                       | $8.602 \times 10^{-6}$         |
| LiOH                            | Vacancy        | 0.31       | 2   | 2.168                       | $6.238 \times 10^{-8}$         |
| LiOH                            | Knock-off      | 0.20       | 1   | 4.499                       | $9.236 \times 10^{-6}$         |
| LiOH                            | Direct-hopping | 0.29       | 2   | 2.522                       | $1.821 \times 10^{-7}$         |
| Li <sub>2</sub> O               | Surface        | 0.31       | 3   | 3.281                       | $2.142 \times 10^{-7}$         |
| Li <sub>2</sub> O               | Vacancy        | 0.24       | 3   | 2.327                       | $1.591 \times 10^{-6}$         |
| Li <sub>2</sub> O               | Knock-off      | 0.49       | 3   | 3.276                       | $2.104 \times 10^{-10}$        |
| Li <sub>2</sub> O               | Direct-hopping | 1.76       | 3   | 3.276                       | $1.287 \times 10^{-31}$        |
| Li <sub>2</sub> CO <sub>3</sub> | Surface        | 0.37       | 2   | 5.016                       | $3.322 \times 10^{-8}$         |
| Li <sub>2</sub> CO <sub>3</sub> | Vacancy        | 0.21       | 1   | 2.304                       | $1.649 \times 10^{-6}$         |
| Li <sub>2</sub> CO <sub>3</sub> | Knock-off      | 0.24       | 1   | 4.177                       | $1.709 \times 10^{-6}$         |
| Li <sub>2</sub> CO <sub>3</sub> | Direct-hopping | 0.48       | 1   | 5.016                       | $2.415 \times 10^{-10}$        |
| LiF                             | Surface        | 0.19       | 2   | 2.860                       | $1.097 \times 10^{-5}$         |
| LiF                             | Vacancy        | 0.66       | 3   | 2.851                       | $2.305 \times 10^{-13}$        |
| LiF                             | Knock-off      | 0.25       | 3   | 3.525                       | $2.486 \times 10^{-6}$         |
| LiF                             | Direct-hopping | 0.54       | 3   | 2.035                       | $1.187 \times 10^{-11}$        |

## References

- 1 L. Fan, H. L. Zhuang, L. Gao, Y. Lu and L. A. Archer, *J. Mater. Chem. A*, 2017, **5**, 3483–3492.
- 2 K. Leung and K. L. Jungjohann, *J. Phys. Chem. C*, 2017, **121**, 20188–20196.
- 3 M. D. Radin, J. F. Rodriguez, F. Tian, D. J. Siegel, *J. Am. Chem. Soc.* 2012, **134**, 1093-1103.
- 4 Y.-X. Lin, Z. Liu, K. Leung, L.-Q. Chen, P. Lu, Y. Qi, *J. Power Sources* 2016, **309**, 221-230.
